# Supplementary material for: Prognostic Effects of Inappropriate Empirical Antimicrobial Therapy in Adults With Community-Onset Bacteremia: Age Matters
Source: PubMed Central journal article supplement (PMC9037591; doi:10.3389/fmed.2022.861032), 2022-04-11
Supplement: Data_Sheet_1.pdf [file Data_Sheet_1.pdf]

**SUPPLEMENTAL DATA**

**Supplemental Figure 1.** Flowchart of patient selections.

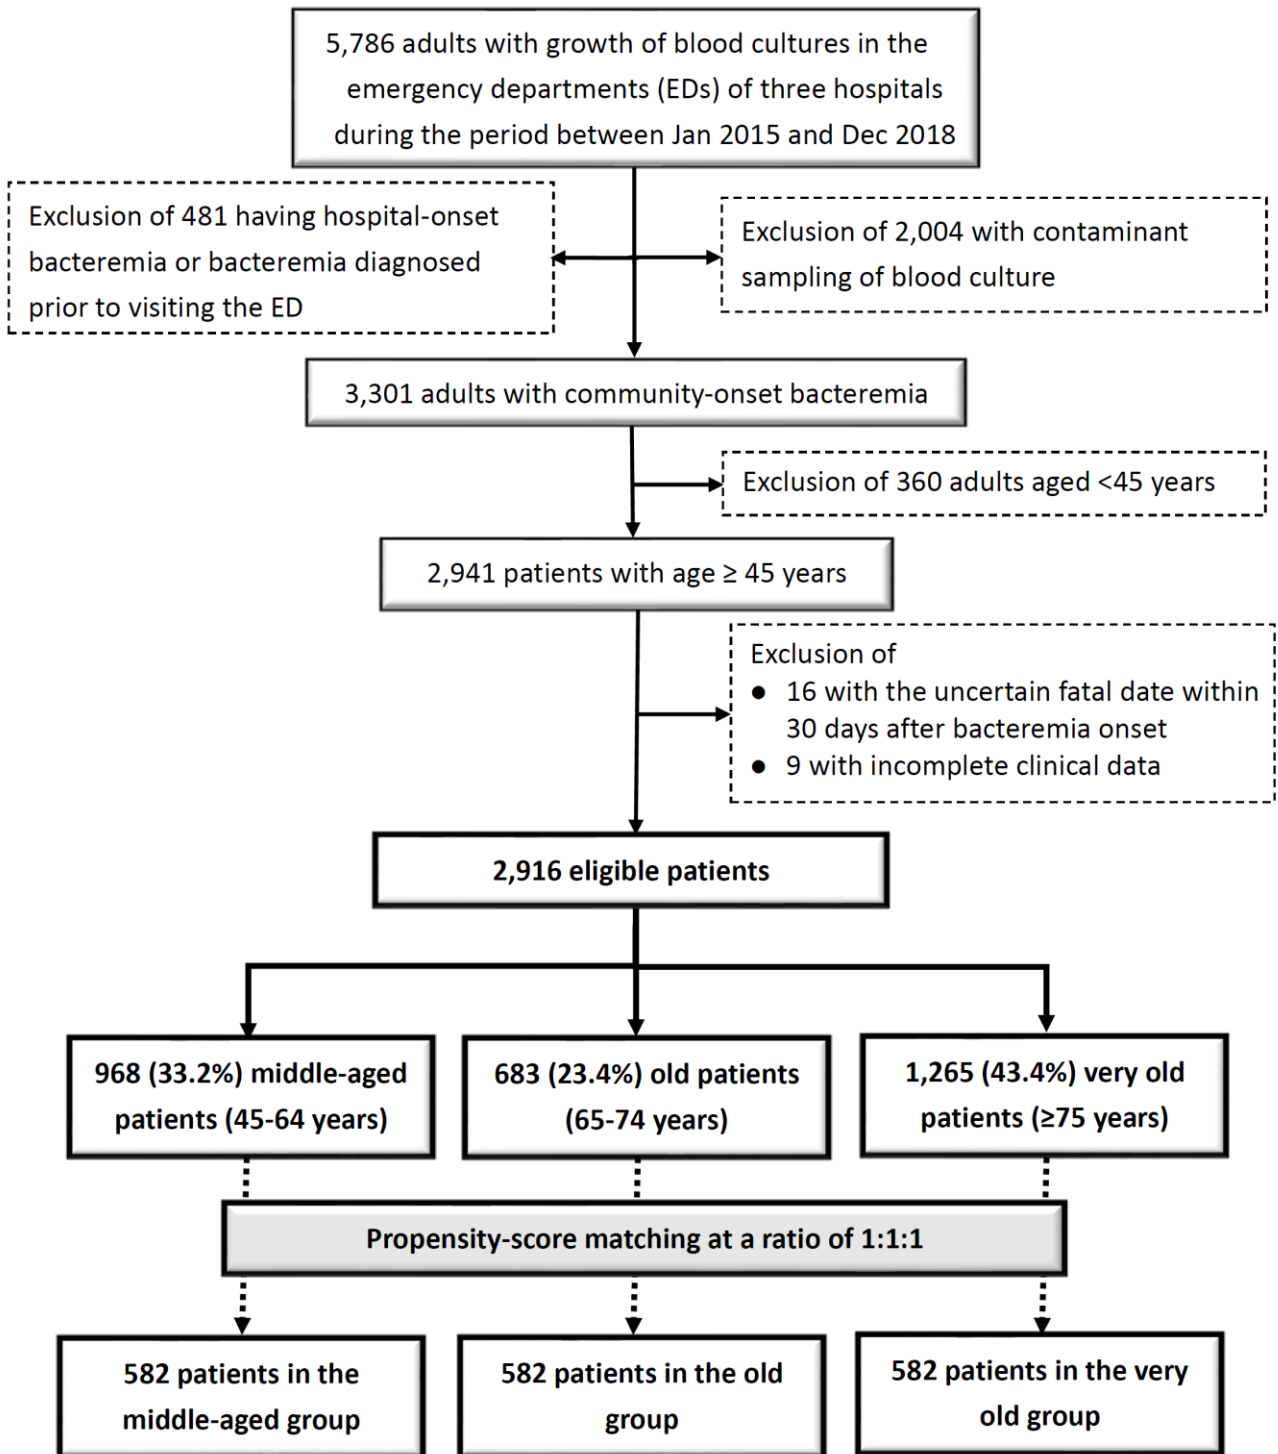

**Supplemental Table 1.** Major classes of empirical antibiotics in the middle-aged, old, and very old groups.

| Clinical variable                     | Patient number (%)*    |                   |                      | <i>P</i> value |
|---------------------------------------|------------------------|-------------------|----------------------|----------------|
|                                       | Middle-aged<br>n = 968 | Old<br>n = 683    | Very old<br>n = 1265 |                |
| Major empirical antibiotic            |                        |                   |                      |                |
| <b>Third-generation cephalosporin</b> | <b>368 (38.0)</b>      | <b>283 (41.4)</b> | <b>448 (35.4)</b>    | <b>0.03</b>    |
| <b>First-generation cephalosporin</b> | <b>124 (12.8)</b>      | <b>55 (8.1)</b>   | <b>124 (9.8)</b>     | <b>0.005</b>   |
| Second-generation cephalosporin       | 123 (12.7)             | 87 (12.7)         | 172 (13.6)           | 0.79           |
| Fourth-generation cephalosporin       | 107 (11.1)             | 70 (10.2)         | 126 (10.0)           | 0.70           |
| <b>Aminopenicillin/BLI</b>            | <b>87 (9.0)</b>        | <b>54 (7.9)</b>   | <b>146 (11.5)</b>    | <b>0.02</b>    |
| Fluoroquinolone                       | 66 (6.8)               | 49 (7.2)          | 95 (7.5)             | 0.82           |
| Glycopeptide                          | 65 (6.7)               | 41 (6.0)          | 61 (4.8)             | 0.15           |
| <b>Ureidopenicillin/BLI</b>           | <b>29 (3.0)</b>        | <b>31 (4.5)</b>   | <b>71 (5.6)</b>      | <b>0.01</b>    |
| Carbapenem                            | 27 (2.8)               | 24 (3.5)          | 42 (3.3)             | 0.67           |
| Ureidopenicillin                      | 21 (2.2)               | 20 (2.9)          | 31 (2.5)             | 0.62           |

BLI =  $\beta$ -lactamase inhibitor. Boldface indicates statistical significance ( $P < 0.05$ ) in the univariable analysis.

**Supplemental Table 2.** Top 10 causative microorganisms in the middle-aged, old, and very old groups.

| Microorganisms                  | Microorganism number (%) |                   |                     | <i>P</i> value |
|---------------------------------|--------------------------|-------------------|---------------------|----------------|
|                                 | Middle-aged<br>n=1,065   | Old<br>n=762      | Very old<br>n=1,454 |                |
| <i>Escherichia coli</i>         | <b>365 (34.3)</b>        | <b>277 (36.4)</b> | <b>580 (39.9)</b>   | <b>0.01</b>    |
| <i>Klebsiella pneumoniae</i>    | <b>167 (15.7)</b>        | <b>124 (16.3)</b> | <b>164 (11.3)</b>   | <b>0.001</b>   |
| <i>Staphylococcus aureus</i>    | <b>158 (14.8)</b>        | <b>84 (11.0)</b>  | <b>133 (9.1)</b>    | <b>0.03</b>    |
| <i>Streptococcus agalactiae</i> | 30 (2.8)                 | 17 (2.2)          | 30 (2.1)            | 0.45           |
| <i>Pseudomonas aeruginosa</i>   | 27 (2.5)                 | 27 (3.5)          | 54 (3.7)            | 0.24           |
| <i>Enterobacter cloacae</i>     | 27 (2.5)                 | 27 (3.5)          | 35 (2.4)            | 0.27           |
| <i>Proteus mirabilis</i>        | 20 (1.9)                 | 14 (1.8)          | 42 (2.9)            | 0.15           |
| <i>Salmonella enteritidis</i>   | 20 (1.9)                 | 9 (1.2)           | 19 (1.3)            | 0.38           |
| <i>Streptococcus pneumoniae</i> | <b>14 (1.3)</b>          | <b>12 (1.7)</b>   | <b>39 (2.7)</b>     | <b>0.04</b>    |
| <i>Enterococcus faecalis</i>    | <b>11 (1.0)</b>          | <b>21 (2.8)</b>   | <b>42 (2.9)</b>     | <b>0.005</b>   |

Boldface indicates statistical significance ( $P < 0.05$ ) in the univariable analysis.

**Supplemental Table 3.** Risk factors of 30-day crude mortality in overall patients.

| Variable                                                     | Patient number (%)*     |                        | Univariable analysis      |             | Multivariable analysis      |              |
|--------------------------------------------------------------|-------------------------|------------------------|---------------------------|-------------|-----------------------------|--------------|
|                                                              | Death<br>n = 449        | Survival<br>n = 2467   | OR (95% CI)               | P value     | Adjusted OR (95% CI)        | P value      |
| <b>Delayed AAT, hour, median (IQR)</b>                       | <b>2.5 (1.5 – 22.1)</b> | <b>2.0 (1.0 – 7.5)</b> | –                         | <0.001      | <b>1.003 (1.002–1.004)</b>  | <0.001       |
| Gender, male                                                 | 267 (59.5)              | 1220 (49.5)            | 1.50 (1.22–1.84)          | <0.001      | NS                          | NS           |
| <b>Nursing-home residence</b>                                | <b>56 (12.5)</b>        | <b>117 (4.7)</b>       | <b>2.86 (2.05–4.01)</b>   | <0.001      | <b>1.71 (1.12 – 2.62)</b>   | <b>0.01</b>  |
| <b>Polymicrobial bacteremia</b>                              | <b>78 (17.4)</b>        | <b>211 (8.6)</b>       | <b>2.25 (1.70–2.98)</b>   | <0.001      | <b>1.56 (1.09 -2.24)</b>    | <b>0.02</b>  |
| <b>Pitt bacteremia score ≥ 4</b>                             | <b>290 (64.6)</b>       | <b>319 (12.9)</b>      | <b>12.28 (9.79–15.40)</b> | <0.001      | <b>10.13 (7.82 – 13.12)</b> | <0.001       |
| <b>Inadequate source control during antibiotic therapy</b>   | <b>78 (17.4)</b>        | <b>211 (8.6)</b>       | <b>2.08 (1.30–3.33)</b>   | <0.001      | <b>2.87 (1.59 – 5.20)</b>   | <0.001       |
| Source of bacteremia                                         |                         |                        |                           |             |                             |              |
| <b>Pneumonia</b>                                             | <b>173 (38.5)</b>       | <b>274 (11.1)</b>      | <b>5.02 (4.00–6.30)</b>   | <0.001      | <b>1.86 (1.37 – 2.51)</b>   | <0.001       |
| <b>Urinary tract infection</b>                               | <b>50 (11.1)</b>        | <b>912 (37.0)</b>      | <b>0.21 (0.16–0.29)</b>   | <0.001      | <b>0.42 (0.24 – 0.73)</b>   | <b>0.002</b> |
| Biliary tract infection                                      | 22 (4.9)                | 240 (9.7)              | 0.48 (0.31–0.75)          | 0.001       | NS                          | NS           |
| <b>Liver abscess</b>                                         | <b>7 (1.6)</b>          | <b>91 (3.7)</b>        | <b>0.41 (0.19–0.90)</b>   | <b>0.02</b> | <b>0.35 (0.15 – 0.82)</b>   | <b>0.02</b>  |
| Causative microorganism                                      |                         |                        |                           |             |                             |              |
| <i>Escherichia coli</i>                                      | 112 (24.9)              | 1110 (45.0)            | 0.41 (0.32–0.51)          | <0.001      | NS                          | NS           |
| <i>Klebsiella pneumoniae</i>                                 | 101 (22.5)              | 352 (14.3)             | 1.74 (1.36–2.24)          | <0.001      | NS                          | NS           |
| <i>Staphylococcus aureus</i>                                 | 78 (17.4)               | 298 (12.1)             | 1.53 (1.17–2.01)          | 0.002       | NS                          | NS           |
| <i>Pseudomonas aeruginosa</i>                                | 36 (8.0)                | 72 (2.9)               | 2.90 (1.92–4.38)          | <0.001      | 1.66 (0.96 – 2.86)          | 0.07         |
| <b>Fatal comorbidity (McCabe and Jackson classification)</b> | <b>214 (28.8)</b>       | <b>235 (10.8)</b>      | <b>3.33 (2.70 – 4.10)</b> | <0.001      | <b>2.30 (1.70 – 3.12)</b>   | <0.001       |
| Comorbidity                                                  |                         |                        |                           |             |                             |              |
| <b>Haemato-oncology</b>                                      | <b>216 (48.1)</b>       | <b>682 (27.6)</b>      | <b>2.43 (1.98–2.98)</b>   | <0.001      | <b>1.70 (1.26 – 2.29)</b>   | <0.001       |
| Hypertension                                                 | 214 (47.7)              | 1321 (53.5)            | 0.79 (0.65–0.97)          | 0.02        | NS                          | NS           |
| Diabetes mellitus                                            | 154 (34.3)              | 1014 (41.1)            | 0.71 (0.60–0.84)          | 0.007       | NS                          | NS           |
| Neurological disease                                         | 129 (28.7)              | 595 (24.1)             | 1.27 (1.01–1.59)          | 0.04        | NS                          | NS           |
| <b>Liver cirrhosis</b>                                       | <b>84 (18.7)</b>        | <b>281 (11.4)</b>      | <b>1.79 (1.37–2.34)</b>   | <0.001      | <b>2.94 (2.04 – 4.24)</b>   | <0.001       |

AAT = appropriate antimicrobial therapy; CI = confidence interval; IQR = interquartile range; OR = odds ratio; NS = not significant (by backward multivariable regression). Boldface indicates statistical significance ( $P < 0.05$ ) in the logistic regression model.

\*Data are expressed as numbers (%), unless indicated specifically.
